# Supplementary material
Source: PubMed Central journal article supplement (PMC6323020)
Supplement: 477606_1_En_93_MOESM1_ESM.pdf [file 477606_1_En_93_MOESM1_ESM.pdf]

| GENE           | GENE NAME                                            | OMIM    | MOI   | OMIM DISEASE NAME                                                  | REASON FOR IN/EXCLUDING THE VARIANT AS PATHOGENIC                                                                                                                                                                                                                                                         | ENSEMBL TRANSCRIPT | CHR | POS [HG19]  | VARIANT  | AAE        | COVERAGE [fold] | VARIANT FREQUENCY [%] | dbSNP       | MAJOR ALLELE HOMO * | HET * | MINOR ALLELE HOMO * | ExAC SERVER: VARIANTS PER ALLELES (TOTAL) | gnomAD SERVER: VARIANTS PER ALLELES (TOTAL) |
|----------------|------------------------------------------------------|---------|-------|--------------------------------------------------------------------|-----------------------------------------------------------------------------------------------------------------------------------------------------------------------------------------------------------------------------------------------------------------------------------------------------------|--------------------|-----|-------------|----------|------------|-----------------|-----------------------|-------------|---------------------|-------|---------------------|-------------------------------------------|---------------------------------------------|
| <b>SLC25A4</b> | solute carrier family 25 member 4                    | #615418 | AR    | Mitochondrial DNA depletion syndrome 12B (cardiomyopathic type) AR | <b>confirmed:</b> missense mutation of a conserved amino acid, known disease association with mutations in <i>SLC25A4</i> , new mutation, clinical phenotype of the patient corresponds to known clinical features.                                                                                       | ENST00000281456    | 4   | 186.066.967 | A>C      | Q218P      | 85              | 99                    |             |                     |       |                     | 121.190 / 0                               | 277.200 / 0                                 |
| <b>FAT1</b>    | FAT tumor suppressor homolog 1 ( <i>Drosophila</i> ) | *600976 | AR AD |                                                                    | <b>excluded:</b> 238 heterozygous and 1 homozygous variants in ExAC. <b>NO</b> increased tumor growth in our patient as seen in homozygous loss-of function mutations in <i>Drosophila</i> and for spontaneous mutations in human glioblastoma multiforme brain tumors.                                   | ENST00000441802    | 4   | 187.557.962 | T>C      | Y1250C     | 254             | 99                    | rs142805532 | 2496                | 8     | 0                   | 120.738 / 240                             | 277.168 / 546                               |
| <b>NIPBL</b>   | Nipped-B homolog ( <i>Drosophila</i> )               | #122470 | AR    | Cornelia de Lange syndrome type 1                                  | <b>excluded:</b> the phenotype does not fit with the disease description in OMIM. <b>NO</b> characteristic facial dysmorphism, no prenatal growth retardation, or upper limb anomalies.                                                                                                                   | ENST00000282516    | 5   | 37.058.994  | C>T      | S2471F     | 126             | 99                    |             |                     |       |                     | 120.774 / 0                               | 243.406 / 0                                 |
| <b>DCDC5</b>   | doublecortin domain containing 5                     | *612321 |       |                                                                    | <b>excluded:</b> 532 heterozygous and 18 homozygous variants in ExAC. <b>NO</b> brain malformation as could be expected for mutations in proteins similar to doublecortin.                                                                                                                                | ENST00000339794    | 11  | 30.926.525  | C>T      | A510T      | 124             | 99                    | rs61747656  | 2435                | 66    | 3                   | 121.282 / 568                             | 274.498 / 1396                              |
| <b>DNAJC24</b> | DnaJ (Hsp40) homolog, subfamily C, member 24         | *611072 | AR    |                                                                    | <b>excluded:</b> homozygous knock-out mice show increased embryonic lethality, decreased embryonic size, and polydactyly. <b>NO</b> such dysmorphic features seen in our patient                                                                                                                          | ENST00000465995    | 11  | 31.436.491  | G>A      | R82Q       | 67              | 100                   |             |                     |       |                     | 110.560 / 3                               | 244.280 / 4                                 |
| <b>ARHGAP1</b> | Rho GTPase activating protein 1                      | *602732 |       |                                                                    | <b>excluded:</b> 889 heterozygous and 10 homozygous variants in ExAC                                                                                                                                                                                                                                      | ENST00000311956    | 11  | 46.702.070  | G>A      | L263F      | 85              | 99                    | rs144801476 | 2474                | 29    | 1                   | 120.888 / 909                             | 277.142 / 2041                              |
| <b>EML3</b>    | echinoderm microtubule associated protein like 3     |         |       |                                                                    | <b>excluded:</b> <i>EML3</i> is a nuclear microtubule-binding protein required for the correct alignment of chromosomes in the metaphase. <b>NO</b> brain malformation or band heterotopia nor chromosomal rearrangements found in our patient as seen for mutations in other homologs in the EML family. | ENST00000529309    | 11  | 62.369.890  | A>AAGGGC | S880Afs*18 | 150             | 99                    | rs573593516 | 2501                | 3     | 0                   | 30.095 / 49                               | 179.480 / 361                               |
| <b>USP3</b>    | ubiquitin specific peptidase 3                       | *604728 |       |                                                                    | <b>excluded:</b> deletion of <i>USP3</i> in mice increases the incidence of spontaneous tumors and affects hematopoiesis. <b>NO</b> oncological or hematological symptoms present in our patient                                                                                                          | ENST00000380324    | 15  | 63.881.000  | T>C      | C439R      | 116             | 98                    |             |                     |       |                     | 32.767 / 4                                | 246.128 / 7                                 |

**Supplemental table 1: Homozygous variants in the autozygous region that cause an amino acid exchange and were predicted to be potentially disease causing by the MutationTaster software. MOI, mode of inheritance; AR, autosomal recessive; AD, autosomal dominant; AAE, amino acid exchange, \* Frequencies refer to the genotypes of the 1000 Genome Project; ExAC, Exome Aggregation Consortium (<http://http://exac.broadinstitute.org/>); Mouse phenotype data were obtained from the mouse phenotype database: <http://www.mousephenotype.org/data/search/gene>**

The following mitochondria associated genes were located in the autozygous region (n=17 out of 1130): *AMACR, AT1L, COQ4, DDHD1, ECHS1, ETFA, GCSH, GLDC, IDH2, MTFMT, PC, PDHX, POLG, SDHAF2, SLC25A4, UQCRC3, WWOX*  
=> only in *SLC25A4* a potentially pathogenic variant was discovered by MutationTaster 2.
