# Supplementary material
Source: PubMed Central journal article supplement (PMC6323020)
Supplement: 477606_1_En_93_MOESM2_ESM.pdf [file 477606_1_En_93_MOESM2_ESM.pdf]

| mtDNA position | dbSNP       | REF | ALT | Heteroplasmy [%] |
|----------------|-------------|-----|-----|------------------|
| 750            | rs2853518   | A   | G   | 100              |
| 1189           | rs28358571  | T   | C   | 100              |
| 1438           | rs2001030   | A   | G   | 100              |
| 1811           | rs28358576  | A   | G   | 100              |
| 2706           | rs2854128   | A   | G   | 100              |
| 3480           | rs28358584  | A   | G   | 100              |
| 4640           | .           | C   | T   | 100              |
| 6419           | .           | A   | C   | 19               |
| 7028           | rs2015062   | C   | T   | 100              |
| 8860           | rs2001031   | A   | G   | 100              |
| 9055           | rs200191755 | G   | A   | 100              |
| 9647           | rs28575684  | T   | C   | 100              |
| 9698           | rs9743      | T   | C   | 98               |
| 10398          | rs2853826   | A   | G   | 100              |
| 10550          | rs28358280  | A   | G   | 97               |
| 11017          | rs28594904  | T   | C   | 100              |
| 11299          | rs28358285  | T   | C   | 100              |
| 11467          | rs2853493   | A   | G   | 100              |
| 11719          | rs2853495   | G   | A   | 100              |
| 12308          | rs2853498   | A   | G   | 95               |
| 12372          | rs2853499   | G   | A   | 96               |
| 14167          | rs28357670  | C   | T   | 100              |
| 14766          | rs3135031   | C   | T   | 100              |
| 14798          | rs28357681  | T   | C   | 100              |
| 15326          | rs2853508   | A   | G   | 100              |

**Supplemental table 2:** variants found in the patient mtDNA
